# Supplementary material for: Monoamine Oxidase A Contributes to Serotonin—But Not Norepinephrine-Dependent Damage of Rat Ventricular Myocytes
Source: MDPI journal article supplement (doi:10.3390/biom13061013), 2023-06-19
Supplement: s1 [file s1]

Supplement Table S1: List of primer sequences used in this study

| Gene          | Forward               | Reverse                   | Reference   |
|---------------|-----------------------|---------------------------|-------------|
| <i>ALDH2</i>  | TGGCTGATCTCATCGAACGG  | CAGCCAGCATAATAGCCGGAGA    | NM_032416.1 |
| <i>AOC3</i>   | GCGAGAAGTTTGGGAACCGA  | TTCTTCAACCCTGCCACATCC     | NM_031582.3 |
| <i>B2M</i>    | GCCGTCGTGCTTGCCATTC   | CTGAGGTGGGTGGAAGTGAAGAC   | NM_012512.2 |
| <i>CAT</i>    | GCCCCTCCTCGTTCAAAGATG | TATCCAAAAGCACCTGCTCCC     | NM_012520.2 |
| <i>HPRT</i>   | CCAGCGTCGTGATTAGTGAT  | CAAGTCTTTCAGTCCTGTCC      | NM_012583.2 |
| <i>HTR2A</i>  | TGGTCATCATGGCAGTGTC   | CCACCGGTACCCATACAGGA      | NM_017254.1 |
| <i>HTR2B</i>  | ATGTTTGAGGCTACATGGCCC | CGGGAATTGCACTGATTGGC      | NM_017250.2 |
| <i>MAOA</i>   | GTTGGACAAAACTGCTCGGG  | GGAACCACAGGGCAGATACC      | NM_033653.1 |
| <i>MAOB</i>   | GGCTGTGCTGCTATAATGGGA | ATAATGGACTGGCTGCAGAGC     | NM_013198.1 |
| <i>RPL32</i>  | CAGGGTGCGGAGAAGATTCA  | TCTCAGCACAGTAAGATTTGTTTGC | NM_013226.3 |
| <i>SLC6A4</i> | AGGAGTTCTACTTGCGCCAT  | TTGCCAGATGTTTTGACGCC      | NM_013034.4 |
